# Supplementary material
Source: publisher figshare collection journal article supplement (https://tandf.figshare.com/ndownloader/files/24697206)
Supplement: Supplementary file 1 [file 24697206]

## Technical Appendix

**Table 1. Summary of school travel literature and equity analyses.**

| Citation                  | Geog.                       | Sample size   | Data               | Age Group   | Modes |   |   |   |   | Equity Indicators |   |    |    |    |  | N | C                                                        | Major findings                                                                                                                                                                     |
|---------------------------|-----------------------------|---------------|--------------------|-------------|-------|---|---|---|---|-------------------|---|----|----|----|--|---|----------------------------------------------------------|------------------------------------------------------------------------------------------------------------------------------------------------------------------------------------|
|                           |                             |               |                    |             | W     | B | T | S | A | R                 | I | FR | St | FB |  |   |                                                          |                                                                                                                                                                                    |
| School choice focused     |                             |               |                    |             |       |   |   |   |   |                   |   |    |    |    |  |   |                                                          |                                                                                                                                                                                    |
| Krizek et al. (2014)      | St. Paul, Minn.             | NA            | Emissions modeling | Grades K-6  | x     |   |   | x | x | x                 |   |    |    |    |  | x | Emissions and costs increase with school choice policies |                                                                                                                                                                                    |
| Scott and Marshall (2019) | Philadelphia                | NA            | Spatial modeling   | Grades 9-12 |       |   | x |   |   |                   |   |    |    |    |  | x | x                                                        | Travel to school by transit takes 2x longer than by car limiting capacity for choice                                                                                               |
| Wilson et al. (2007)      | St. Paul, Minn.             | NA            | Emissions modeling | Elementary  | x     | x |   | x | x |                   |   |    |    |    |  |   | x                                                        | Students in city-wide school walk 6x less and have 4.5x more VMT, cost, and emissions compared to neighborhood school; school busing increases system costs more in choice systems |
| Wilson et al. (2010)      | St. Paul & Roseville, Minn. | 1,216 parents | Original survey    | Grades K-6  | x     |   |   | x | x | x                 | x |    | x  |    |  |   | x                                                        | Mode and attitudes differ by school type, income, and race; low-income and students of color use bus more                                                                          |
| Yang et al. (2012)        | Eugene, Ore.                | 1,123         | Original survey    | Grades K-5  | x     | x |   |   | x | x                 | x |    |    |    |  |   | x                                                        | School choice increases travel distance and driving to school; no association with race/ethnicity, middle incomes walk/bike more                                                   |
| Zuniga (2012)             | Denver                      | 65 parents    | Interviews         | Elementary  | x     | x |   |   |   | x                 | x |    |    |    |  |   | x                                                        | School choice increases travel distance and driving to school; no association with race/ethnicity, middle incomes walk/bike more                                                   |
| Walking/biking focused    |                             |               |                    |             |       |   |   |   |   |                   |   |    |    |    |  |   |                                                          |                                                                                                                                                                                    |
| Banerjee et al. (2014)    | Los Angeles                 | 104           | Interviews         | Grade 5     | x     | x |   |   |   | x                 |   |    |    |    |  |   | x                                                        | Inner-city Latino children have more concern for social environments than physical; and avoided walking routes with dangerous objects, gangs, and traffic                          |
| Boarnet et al. (2005)     | S. Calif.                   | 1,124 parents | Original survey    | Grades 3-5  | x     | x |   |   |   | x                 | x |    |    |    |  |   |                                                          | SRTS projects along travel route increase walking/cycling; no diff by race ethnicity                                                                                               |
| Clifton (2003)            | US                          | 4,344 trips   | NPTS               | Age 13-18   | x     | x | x | x | x |                   |   |    |    |    |  |   |                                                          | Teens with drivers licenses more likely to drive to and participate in after school activities; teens without car access may have limited destinations available                   |

| Citation               | Geog.                  | Sample size        | Data            | Age Group           | Modes |   |   |   | Equity Indicators |   |   |    |    |    |   | N | C | Major findings                                                                                                                                                                                    |
|------------------------|------------------------|--------------------|-----------------|---------------------|-------|---|---|---|-------------------|---|---|----|----|----|---|---|---|---------------------------------------------------------------------------------------------------------------------------------------------------------------------------------------------------|
|                        |                        |                    |                 |                     | W     | B | T | S | A                 | R | I | FR | St | FB |   |   |   |                                                                                                                                                                                                   |
| Ewing et al. (2004)    | Alachua County, Fla.   | 709                | RTS/STS         | Grades K-12         | x     | x |   | x | x                 |   | x |    |    |    |   | x |   | Income and car ownership associated with less walking; shorter walk and bike times lead to more walking and biking                                                                                |
| He (2011)              | S. Calif.              | 3,646              | RTS             | Grades K-12         | x     | x |   | x | x                 | x | x |    |    |    |   | x |   | School quality has little impact on mode choice; Latino students less likely to drive, older students and higher income more likely to drive; distance highly predictive of mode choice           |
| McDonald (2006)        | US                     | 34,593             | NHTS            | Age 0-18            | x     | x |   | x | x                 | x | x |    |    |    |   |   |   | Low-income children and children of color traveled less and less often for social or recreational trips                                                                                           |
| McDonald (2007a)       | Alameda County, Calif. | 614                | RTS             | Age 5-18            | x     |   |   |   |                   | x | x |    |    | x  |   | x |   | Social cohesion predicts walking; Black students less likely to walk in Black neighborhoods                                                                                                       |
| McDonald (2007)        | US                     | Varies by survey   | NPTS/NHTS       | Age 5-18            | x     | x |   |   |                   | x | x |    |    |    |   |   |   | Walking/biking declined from 41% to 13% of trips between 1969 and 2001, half of which can be attributed to increasing distance; low-income students and student of color more likely to walk/bike |
| McDonald (2008a)       | US                     | 14,533             | NHTS            | Age 5-18            | x     | x |   |   |                   | x | x |    |    |    |   | x |   | Low-income, Black, Latino students walk more, but racial differences vanish when controlling for income; Blacks and Latinos live closer to school                                                 |
| McDonald (2008b)       | US                     | 8,231              | NHTS            | Age 5-18            | x     | x |   |   |                   | x | x |    |    | x  |   |   |   | Young children less likely to walk or cycle when mother commutes in morning; Latino students odds walking/cycling still higher                                                                    |
| McDonald et al. (2011) | US                     | Varies by analysis | NPTS/NHTS       | Grades K-8 and K-12 | x     | x |   | x | x                 | x | x |    |    | x  | x |   |   | For K-8 students, less walking with increasing distance; white, immigrant, low-income, and zero vehicle households walk/bike more; concern with weather and crime decreases walking/biking        |
| McDonald et al. (2014) | DC, Fla., Tex., Ore.   | 801 schools        | Original survey | Grades K-12         | x     | x |   |   |                   | x |   |    | x  |    |   | x |   | Students walk more after SRTS interventions; only higher prop of FRL associated with more walking                                                                                                 |
| McMillan (2007)        | S. Calif.              | 1,128 caregivers   | Original survey | Grades 3-5          | x     | x |   |   |                   | x | x |    |    | x  | x |   |   | Convenience, social interaction, family approval associated with walking/cycling and matter more than built form; determinants vary by SES                                                        |

| Citation                         | Geog.                  | Sample size | Data            | Age Group     | Modes |   |   |   | Equity Indicators |   |   |    |    |    |   |   | Major findings                                                                                                                                                                                                   |
|----------------------------------|------------------------|-------------|-----------------|---------------|-------|---|---|---|-------------------|---|---|----|----|----|---|---|------------------------------------------------------------------------------------------------------------------------------------------------------------------------------------------------------------------|
|                                  |                        |             |                 |               | W     | B | T | S | A                 | R | I | FR | St | FB | N | C |                                                                                                                                                                                                                  |
| Rodriguez and Vogt (2009)        | Michigan               | 1,897       | Original survey | Grades 3-5    | x     |   |   |   |                   |   |   |    |    |    |   |   | Odds of walking decline with distance, increase with perceptions that walking is safe and saves time. No discussion of variation across socioeconomic status or neighborhood type                                |
| Schlossberg et al. (2005)        | Bend, Ore.             | 104         | Original survey | Middle school | x     | x |   |   |                   |   |   |    |    |    |   |   | Convenience, schools requirements, urban form, and personal safety are barriers to walking to a school located at the urban fringe                                                                               |
| Schlossberg et al. (2006)        | Oregon                 | 287         | Original survey | Grades 6-8    | x     | x |   |   |                   | x | x |    |    |    |   |   | Distance strongly predictive of walking and cycling; convenience and attitudes are important predictors; no analysis by race or income                                                                           |
| Seraj et al. (2012)              | S. Calif.              | 1,000       | NHTS add-on     | School age    | x     | x |   |   |                   | x | x |    |    |    |   |   | Attitudes toward children walking and cycling varies by race and income; familiarity with alterative modes yields fewer negative attitudes                                                                       |
| Yang and Markowitz (2012)        | Eugene, Ore.           | 1,197       | Original survey | Grades K-5    | x     | x |   |   |                   |   | x |    |    |    |   |   | Low-income children with low positive attitudes toward active travel were more likely to walk/bike; for high-income families, low car attitudes predicted walking/cycling                                        |
| Yarlagadda and Srinivasan (2008) | SF Bay Area, Calif.    | 4,352       | RTS             | Age 0-18      | x     | x | x | x | x                 | x | x |    | x  |    |   |   | Travel to and from school varies by race and flexibility of parents' work schedules; students are less sensitive to distance coming from school; joint decisionmaking includes household members besides parents |
| <b>Other modes</b>               |                        |             |                 |               |       |   |   |   |                   |   |   |    |    |    |   |   |                                                                                                                                                                                                                  |
| Carlson et al. (2014)            | Baltimore, DC, Seattle | 294         | Original survey | Age 12-15     |       |   |   |   |                   |   |   |    |    |    |   |   | In a predominately high SES sample, parents who believe pedestrian environment is safe are more likely to walk/bike; psychosocial barriers hinder walking/biking; no examination across race or SES              |
| Das and Fang (2015)              | Minneapolis            | 2,453       | Original survey | Grades 9-12   |       |   | x |   |                   | x | x | x  |    |    | x |   | Free transit pass reduced number of days absent controlling for race/ethnicity but did not influence GPA                                                                                                         |
| Gottfried (2017)                 | US                     | 14,370      | ECLS            | Grade K       |       |   |   | x |                   | x | x |    | x  |    | * |   | Students taking school bus less likely to be absent and have chronic absenteeism controlling                                                                                                                     |

| Citation                                                                                                                                                                                                                                                                                                                                                                                                                                                                                                                                                       | Geog.                    | Sample size        | Data             | Age Group   | Modes |   |   |   | Equity Indicators |   |   |    |    |    |   | Major findings |   |                                                                                                                                                                                                                          |
|----------------------------------------------------------------------------------------------------------------------------------------------------------------------------------------------------------------------------------------------------------------------------------------------------------------------------------------------------------------------------------------------------------------------------------------------------------------------------------------------------------------------------------------------------------------|--------------------------|--------------------|------------------|-------------|-------|---|---|---|-------------------|---|---|----|----|----|---|----------------|---|--------------------------------------------------------------------------------------------------------------------------------------------------------------------------------------------------------------------------|
|                                                                                                                                                                                                                                                                                                                                                                                                                                                                                                                                                                |                          |                    |                  |             | W     | B | T | S | A                 | R | I | FR | St | FB | N |                | C |                                                                                                                                                                                                                          |
|                                                                                                                                                                                                                                                                                                                                                                                                                                                                                                                                                                |                          |                    |                  |             |       |   |   |   |                   |   |   |    |    |    |   |                |   | for race, household structure, and student experiences                                                                                                                                                                   |
| He (2013)                                                                                                                                                                                                                                                                                                                                                                                                                                                                                                                                                      | S. Calif.                | 1,320              | RTS              | Age 5-18    |       |   |   |   |                   | x | x |    |    | x  |   |                |   | Parental employment (especially the mothers') is most significant influence on escorting to school; low-income children more likely to be escorted by others or travel independently; mode specific effects not analyzed |
| McDonald and Aalborg (2009)                                                                                                                                                                                                                                                                                                                                                                                                                                                                                                                                    | East SF Bay Area, Calif. | 432 parents        | Original survey  | Age 10-14   |       |   |   |   | x                 | x |   |    |    |    |   |                |   | Parents cite convenience as most common reason for driving to school, "stranger danger" is number one single reason                                                                                                      |
| McDonald et al. (2004)                                                                                                                                                                                                                                                                                                                                                                                                                                                                                                                                         | SF Bay Area, Calif.      | 1,073/1,234        | Original surveys | MS/JHS & HS |       |   | x |   |                   | x |   | x  |    |    |   |                |   | Free transit pass increased bus ridership and after-school participation but not attendance after one year; high variation in transit use to school across race because of parent perceptions of safety and supervision  |
| Vovsha and Petersen (2005)                                                                                                                                                                                                                                                                                                                                                                                                                                                                                                                                     | Atlanta                  | 3,810 school tours | RTS              | Age 0-18    |       |   |   |   | x                 |   | x |    |    |    |   |                |   | Women are 2.5-3x as likely to escort children to school compared to men but most children are unescorted; fewer characteristics predict escorting back home, highlighting different needs to and from school             |
| Notes: *Variable was English-language learner. W = Walk, B = Bike, T = Transit, S = School Bus, A = Auto; R = Race/ethnicity, I = Income, FR = Free and reduced lunch, St = Household structure, FB = foreign-born status, N = Neighborhood context; Ch = School choice; RTS = Regional travel survey, STS = Statewide travel survey, NPTS = Nationwide Personal Transportation Survey, NHTS = National Household Travel Survey, ECLS = Early Childhood Longitudinal Survey; MS = Middle school, JHS = Junior High School, HS = High school, K = Kindergarten. |                          |                    |                  |             |       |   |   |   |                   |   |   |    |    |    |   |                |   |                                                                                                                                                                                                                          |

**Table 2. Summary of select studies on school choice decision factors.**

| Citation                          | Geography                             | Sample Size    | Data                                     | Academics<br>(class size,<br>outcomes) | Student<br>composition | Distance | Transportation<br>access | Safety | Neighborhood<br>condition or<br>composition | Other |
|-----------------------------------|---------------------------------------|----------------|------------------------------------------|----------------------------------------|------------------------|----------|--------------------------|--------|---------------------------------------------|-------|
| (Altenhofen et al., 2016)         | Denver, CO                            | 500            | Survey<br>interviews                     | ✓                                      |                        | ✓        |                          | ✓      |                                             |       |
| (Bell, 2009b)                     | Detroit                               | 36             | Interviews                               | ✓                                      |                        | ✓        | ✓                        | ✓      | ✓                                           | ✓     |
| (Denice & Gross, 2016)            | Denver                                | 14,000         | Student<br>applications                  | ✓                                      | ✓                      | ✓        |                          |        |                                             |       |
| (Glazerman & Dotter,<br>2017)     | Washington, DC                        | 22,000         | Student<br>applications                  | ✓                                      | ✓                      | ✓        | ✓                        |        |                                             |       |
| (Harris & Larsen, 2015)*          | New Orleans                           | 31,000         | Student<br>applications                  | ✓                                      |                        | ✓        | ✓                        |        |                                             | ✓     |
| (Harris & Larsen, 2017)*          | New Orleans                           | 33,000         | Student<br>applications                  | ✓                                      |                        | ✓        | ✓                        |        |                                             | ✓     |
| (Hastings et al., 2005)           | Mecklenburg County,<br>North Carolina | 37,000         | Student<br>applications                  | ✓                                      | ✓                      | ✓        | ✓                        |        |                                             |       |
| (Kleitz et al., 2000)             | Texas                                 | 1,100          | Survey                                   | ✓                                      |                        | ✓        |                          | ✓      |                                             | ✓     |
| (Jane A. Lincove et al.,<br>2018) | New Orleans                           | 892            | Student<br>applications                  | ✓                                      |                        | ✓        |                          |        |                                             | ✓     |
| (Pattillo, 2015)                  | Chicago                               | 77             | Interviews                               | ✓                                      |                        |          | ✓                        |        |                                             | ✓     |
| (Saporito, 2003)                  | Philadelphia                          | 11,000         | Student<br>applications                  | ✓                                      | ✓                      |          |                          | ✓      |                                             |       |
| (Schneider & Buckley,<br>2002)    | Washington, DC                        | 2,300          | User searches                            | ✓                                      | ✓                      | ✓        |                          |        | ✓                                           |       |
| (Shaw & Northern,<br>2013)*       | National                              | 2,000          | Survey                                   | ✓                                      | ✓                      |          |                          |        |                                             | ✓     |
| (Stein et al., 2011)*             | Indianapolis                          | 1,569<br>1,050 | Survey<br>Student<br>academic<br>records | ✓                                      |                        |          |                          | ✓      | ✓                                           |       |
| (Teske et al., 2009)              | Denver and<br>Washington DC           | 600            | Survey                                   | ✓                                      |                        | ✓        | ✓                        |        |                                             |       |

Notes: “Other” includes extracurriculars, siblings, school facilities. \*Non-peer-reviewed gray literature.
